# Supplementary material for: Polygenic adaptation from standing genetic variation allows rapid ecotype formation
Source: eLife. 2023 Feb 28;12:e82824. doi: 10.7554/eLife.82824 (PMC9977305; doi:10.7554/eLife.82824)
Supplement: Figure 2—figure supplement 3—source data 1. [file elife-82824-fig2-figsupp3-data1.xlsx]

## Sheet: Sheet1
Number	Compared populations	Estimated coast-line distance (km)	FST	FST/(1-FST)
1	Ar-2AR|Ber-1SL	1532.14	0.15	0.18
2	Ar-2AR|Ber-2AR	1532.14	0.15	0.18
3	Ar-2AR|He-1SL	1396.43	0.19	0.23
4	Ar-2AR|Por-1SL	2260.72	0.2	0.25
5	Ar-2AR|Seh-2AR	703.571	0.1	0.11
6	Ar-2AR|Tro-tAR	2796.43	0.2	0.25
7	Ber-1SL|He-1SL	864.286	0.13	0.15
8	Ber-1SL|Por-1SL	1728.57	0.14	0.16
9	Ber-1SL|Tro-tAR	1264.29	0.13	0.16
10	Ber-2AR|Ber-1SL	0	0.04	0.05
11	Ber-2AR|He-1SL	864.286	0.14	0.16
12	Ber-2AR|Por-1SL	1728.57	0.14	0.16
13	Ber-2AR|Tro-tAR	1264.29	0.14	0.17
14	He-1SL|Por-1SL	864.286	0.12	0.13
15	He-1SL|Tro-tAR	2128.57	0.18	0.22
16	Por-1SL|Tro-tAR	2992.86	0.19	0.23
17	Seh-2AR|Ber-1SL	1035.71	0.13	0.15
18	Seh-2AR|Ber-2AR	1035.71	0.12	0.13
19	Seh-2AR|He-1SL	900	0.17	0.2
20	Seh-2AR|Por-1SL	1764.29	0.18	0.22
21	Seh-2AR|Tro-tAR	2300	0.19	0.23
