# Supplementary material for: Polygenic adaptation from standing genetic variation allows rapid ecotype formation
Source: eLife. 2023 Feb 28;12:e82824. doi: 10.7554/eLife.82824 (PMC9977305; doi:10.7554/eLife.82824)
Supplement: Figure 6—source data 1. [file elife-82824-fig6-data1.xlsx]

## Sheet: Sheet1
Locus	Chromosome	Scaffold	Start position	CLUMA CG number	Gene	SNPs								Indels				detected via GO term
						CDS: non-synonymous	CDS: synonymous	Stop retained	Splice site	3' UTR	5' UTR	Intron	Intergenic	Inframe (conservative)	3' UTR	Intron	Intergenic
1	1	6	68627	20452	Novel nucleolar protein 2 (Non2)	.	.	.	.	.	.	.	20	.	.	.	3
	1	6	88768	20457	Ecdysone-induced protein 93F (Eip93F)	.	.	.	.	.	.	9	20	.	.	2	3	Y
2	1	18	629474	2631	pupal cuticle protein 78E (pcp78E)	.	.	.	.	.	.	.	22	.	.	.	6
	1	18	649185	2673	tailless (tll)	1	.	.	.	.	.	.	36	.	.	.	11	Y
	1	18	669600	2806	is part of sNPF receptor (sNPF-R; CG002648)	.	.	.	.	.	.	.	15	.	.	.	5
3	1	18	1240686	2670	NA	4	1	1	1	.	.	4	7	1	.	2	.
	1	18	1243996	2667	NA	1	2	.	.	2	.	.	13	.	.	.	5
4	1	18	1282649	2573	longitudinals lacking (lola)	.	.	.	.	.	.	24	1	.	1	15	.
5	1	43	1081770	8519	Matrix metalloproteinase 1 (Mmp1)	.	.	.	1	24	.	52	.	.	2	6	.
6	1	43	985815	8485	ciliary Opsin 1 (cOps1)	2	2	.	.	.	.	8	37	.	.	5	10
7	1	43	511465	8347	NA	.	.	.	.	.	.	.	33	.	.	.	6
	1	43	523131	23379	NA	7	2	.	.	.	.	.	22	.	.	.	6
8	1	42	676396	8160	SOX-100B	.	.	.	.	.	.	5	.	.	.	2	.
