# Supplementary material for: Polygenic adaptation from standing genetic variation allows rapid ecotype formation
Source: eLife. 2023 Feb 28;12:e82824. doi: 10.7554/eLife.82824 (PMC9977305; doi:10.7554/eLife.82824)
Supplement: Supplementary file 1. — The lower-left part of the table shows the p-values and the upper-right part the corresponding significance levels: **** - 0–0.0001; *** - 0.0001–0.001; ** - 0.001–0.01; * - 0.01–0.05; ns - 0.05–1. [file elife-82824-supp1.xlsx]

## Sheet: Sheet1
	Por-1SL	He-1SL	Ber-1SL	Ber-2AR	Seh-2AR	Ar-2AR	Tro-tAR
Por-1SL	-	ns	ns	ns	****	****	****
He-1SL	0.06925	-	**	ns	****	****	****
Ber-1SL	0.3596	0.006378	-	ns	****	****	****
Ber-2AR	0.619	0.1703	0.1576	-	****	****	****
Seh-2AR	5.63E-10	4.87E-06	1.74E-13	1.93E-09	-	***	ns
Ar-2AR	2.2E-16	1.74E-15	2.2E-16	2.2E-16	0.0001517	-	*
Tro-tAR	5.7E-15	5.68E-10	2.2E-16	1.27E-14	0.06954	0.03893	-
