# Supplementary material for: Polygenic adaptation from standing genetic variation allows rapid ecotype formation
Source: eLife. 2023 Feb 28;12:e82824. doi: 10.7554/eLife.82824 (PMC9977305; doi:10.7554/eLife.82824)
Supplement: Supplementary file 4. — SnpEff was run on the selected BayPass ecotype-associated variants and on all variants. For each analytical group (Region, Impact, Function, Variant) the total numbers for each subgroup and the fractions in respect to the entire analytical group are given. Additionally, the p-values for significant deviation between the selected and entire genome variants were calculated using Fisher’s exact test. [file elife-82824-supp4.xlsx]

## Sheet: Sheet1
		Ecotype-associated variants (N=4,741)				All variants (N=948,128)
		N		%		N		%		p-value
Region
Exon		1061		19.06		239000		20.69		0.002538563
Intron		1821		32.71		389723		33.74		0.1053189
UTR		418		7.51		98365		8.52		0.0069941
Intergenic		2209		39.68		413274		35.78		0.000000001811437
Other		58		1.04		14663		1.27		0.1490632
Impact
High		31		0.56		10744		0.93		0.00251666
Low		612		10.99		141746		12.27		0.003404886
Moderate		479		8.6		101698		8.8		0.6185761
Modifier		4445		79.85		900837		77.99		0.0008337278
Function
Missense		465		45.32		98560		43.06		0.1462238
Nonsense		2		0.19		1670		0.73		0.04045629
Silent		559		54.48		128647		56.21		0.2698506
Variant
SNP		3890		82.05		792032		83.54		0.006363973
InDel		851		17.95		156096		16.46		0.006363973
