# Supplementary material for: Polygenic adaptation from standing genetic variation allows rapid ecotype formation
Source: eLife. 2023 Feb 28;12:e82824. doi: 10.7554/eLife.82824 (PMC9977305; doi:10.7554/eLife.82824)
Supplement: Supplementary file 11. — On sampling dates in squared brackets egg clutches for setting up laboratory cultures were collected from copulating pairs on the water surface. Samples from underlined dates were used for the genomic analyses of the wild populations. [file elife-82824-supp11.xlsx]

## Sheet: Sheet1
Sampling Site		Coordinates				Ecotype		Laboratory Strain		Field Samples		Founding egg clutches
Sehlendorf (Germany)		54° 18' 29" N		10° 43' 30" E		Baltic		Seh-2AR		[05/2017], [06/2017]		69
Ar (Gotland, Sweden)		57° 55' 06" N		18° 56' 19" E		Baltic		Ar-2AR		[08/2018]		36
Kviturdvikpollen (Norway)		60° 15' 58" N		05° 14' 52" E		Baltic		Ber-2AR		06/2017, [08/2018]		40
Kviturdvikpollen (Norway)		60° 15' 58" N		05° 14' 52" E		Atlantic		Ber-1SL		06/2017, [08/2018]		60
Tromsø (Norway)		69° 41' 04" N		18° 53' 59" E		Arctic		Tro-tAR		[06/2018], [07/2018]		47
