# Supplementary material for: Polygenic adaptation from standing genetic variation allows rapid ecotype formation
Source: eLife. 2023 Feb 28;12:e82824. doi: 10.7554/eLife.82824 (PMC9977305; doi:10.7554/eLife.82824)
Supplement: Supplementary file 12. — All primers were designed and tested by Kerstin Schaefer. [file elife-82824-supp12.xlsx]

## Sheet: Sheet1
Chromosome	Scaffold	Primer name	Sequence 5’-3’	Product length
1	8	1.10_f	TTCCTGGAAATACTGCAGCAA	278 bp
		1.10_r	TCAACGAGATTTTCCGGTTTCA
	59	2.8_f	TGTCTTGCGAGGTTCTCTGTT	450 bp
		2.8_r	CGCAATTTCAAGCTCTGATTGC
	6	2.1_f	ACACGAGATGAAACTCATGCG	909 bp
		2.1_r	CCAAGGTCTACGAAAAAGCAGC
	53	3.2_f	CACGGTTAACATGCTTGAAGGA	484 bp
		3.2_r	TCAAGTTCCAGCGCATTCGAT
	18	4.1_f	TGTGACTAACGGCAGGAAAGA	782 bp
		4.1_r	ACAAAACGATTGGAAGCGACG
	43	4.10_f	CCCCGCAAATTTTCTTCGGAA	537 bp
		4.10_r	ATCGGCGGTTGTTTTTGGTTT
	42	5.3_f	GGAATCGCACGAAGCTCATTT	596 bp
		5.3_r	AACGCCACTAACACTCCAAAT
	61	6.14_f	AGCGACACAGATGAAAGACGA	698 bp
		6.14_r	TGCGGCAATTTGTTTTAATGTCC
2	20	7.9_f	ACCTCAATATGCACGTCCAGT	543 bp
		7.9_r	TCTGATATGGTCGCAAGTGGT
	56	8.3_f	CCCCAGCGCTTTTCACATTT	369 bp
		8.3_r	TTTCCTCGGTTCTTCGTCCC
	21	8.6_f	TTTCACTGCCTTGTACACCCC	451 bp
		8.6_r	ATGATTCGATGGGACGACTCG
	4	9.5_f	AGCTCCACTATTCCAAACAGCT	727 bp
		9.5_r	GCCATCAGCCTTGAGAAATGC
	40	9.12_f	TGATCAACCAGTACAAGGTGGA	424 bp
		9.12_r	GTAAGGAAGCATTAGCAGCGC
	50	10.5_f	CGCTACTTTTGCCCATCAACA	478 bp
		10.5_r	TGTCGCCATCACTTTGGAATG
	47C	11.3_f	CATTGCTTGCGATTTGCTTTGA	455 bp
		11.3_r	GGAATCTCGTGCATCGACGAT
	47F	12.7_f	GCCTTGCAATAGCGCATACG	849 bp
		12.7_r	TAGGCTCTGGGGTATGGCTT
3	10	13.4_f	GTTCCTTGCCACTCATTTGCT	450 bp
		13.4_r	TGTCGCCAAACAGGATTTGTG
	41A	14.2_f	TGGCAAATCAAGGACCAGACA	740 bp
		14.2_r	TCGACTTGAGGCATTATTGGGA
	41B	14.9_f	TCTTGCGGCAAGATCCACTTT	606 bp
		14.9_r	TAAACGATTCAGTTCGCACGC
	48	15.1_f	CTCGATTCAGACCGTCCGATT	639 bp
		15.1_r	GGCGTGACCTTCATGAAGAGA
	51	16.6_f	GCTGAATAAGGCATTGCTGGG	492 bp
		16.6_r	GCAGAGTAGTGCGAGTGGAAT
	45B	17.6_f	TCTCACTTTTCACGACGCTTTT	308 bp
		17.6_r	TAGAAGCTGTTCCGCCTCAAG
	5	18.9_f	CAACGTGAGACGAACGAACAG	543 bp
		18.9_r	CGTGGCCTTGTTTCAACACAA
	3	18.8_f	CCACTGAAACCATCGGGACA	227 bp
		118.8_r	AGAATGTGTGACTGTTGCAAAGT
