# Supplementary material for: Polygenic adaptation from standing genetic variation allows rapid ecotype formation
Source: eLife. 2023 Feb 28;12:e82824. doi: 10.7554/eLife.82824 (PMC9977305; doi:10.7554/eLife.82824)
Supplement: Supplementary file 13. — MM – Master Mix. [file elife-82824-supp13.xlsx]

## Sheet: Sheet1
Phases	template DNA	Buffer D1	Buffer N1	MM: Nuclease-free water	MM: REPLI-g Mini Reaction Buffer	MM: REPLI-g Mini DNA Polymerase	MM: Adding total volume
Manufacturers’ Volume (suitable for 15 reactions)	2.5 µl	2.5 µl	5 µl	10 µl	29 µl	1 µl	40 µl
Edited Volume	7.5 µl	1 µl	1.5 µl	0 µl	14.5 µl	0.5 µl	15 µl
