# Supplementary material for: Polygenic adaptation from standing genetic variation allows rapid ecotype formation
Source: eLife. 2023 Feb 28;12:e82824. doi: 10.7554/eLife.82824 (PMC9977305; doi:10.7554/eLife.82824)
Supplement: Supplementary file 14. [file elife-82824-supp14.xlsx]

## Sheet: Sheet1
Covariates		Ar-2AR		Seh-2AR		Ber-2AR		Ber-1SL		He-1SL		Por-1SL
Ecotype (binary)		0		0		0		1		1		1
Sea Surface Salinity (PSU)		7		14.5		31.5		31.5		31.3		33.9
Average Water Temperature 2020 (°C)		7.5		9.1		8.9		8.9		10.1		11.8
